# Supplementary material for: Medical and ethical challenges in low penetrance copy number variants management: state-of-the-art in the Portuguese Clinical Genetics community
Source: Research Square preprint supplement (doi:10.21203/rs.3.rs-6857492/v1), 2025-06-23
Supplement: Supplementary file 1 [file 6da8d9574177182db8ce5138.docx]

| **Variable** | | | **N (%)** | |
| --- | --- | --- | --- | --- |
| Geographical Region of Work | North | 11 (46%) | |
| Center | 5 (21%) | |
| South | 8 (33%) | |
| Years as Medical Genetics Specialist | ≤ 5 | 10 (42%) | |
| > 5 | 14 (58%) | |
| Laboratory Performing Tests | Internal | 11 (46%) | |
| External – Public | 3 (13%) | |
| External – Private | 10 (42%) | |
| Commonly Prescribed Tests for CNV Detection | CGH-Array | 23 (96%) | |
| SNP-Array | 12 (50%) | |
| MLPA | 22 (92%) | |
| NGS | 2 (8%) | |

S2 – Supplementary Table 2 – General characterization of the sample. CGH, comparative genomic hybridization; MLPA, multiplex ligation-dependent probe amplification; NGS, next-generation sequencing; SNP, single nucleotide polymorphism.

N (%), frequency (proportion).
