# Supplementary material for: Medical and ethical challenges in low penetrance copy number variants management: state-of-the-art in the Portuguese Clinical Genetics community
Source: Research Square preprint supplement (doi:10.21203/rs.3.rs-6857492/v1), 2025-06-23
Supplement: Supplementary file [file 59ff754794668fe414178fa3.pdf]

## QUESTIONNAIRE

### PART 1

- 1) Years of Experience as a specialist in Clinical Genetics:
  - a. > 5
  - b. > 5
- 2) In which region of the country is located the public hospital where you work?
  - a. North Zone
  - b. Central Zone
  - c. South Zone
- 3) In cases of CNVs associated with neurodevelopmental disorder, in my service, Clinical Geneticist (check all that apply):
  - a. Discusses cases with the Maternal-Fetal Medicine team
  - b. Refers cases to the Pediatric Neurodevelopment and/or Child Psychiatry consultation
  - c. Refers cases to General and Family Medicine
  - d. Reevaluates cases near adulthood and/or during reproductive planning
  - e. Reevaluates cases when requested
- 4) What techniques have been used for CNV detection (in the last 10 years)? Please check ALL applicable options:
  - a. aCGH
  - b. SNP-array
  - c. MLPA
  - d. Other: \_\_\_\_\_
- 5) Where is the cytogenetic study for CNV detection performed?
  - a. Laboratory within the center
  - b. NHS-contracted laboratory
  - c. Privately contracted laboratory
- 6) If you answered "Contracted Laboratory" in the previous question (NHS or Private), please specify which one. \_\_\_\_\_
- 7) Regarding the classification used (by the clinician and/or the laboratory you work with) for classifying CNVs in postnatal cases, please check ALL that apply:
  - a. Pathogenic / Probably pathogenic
  - b. Variants of unknown significance
  - c. Susceptibility variants
  - d. Variants of uncertain significance
  - e. Variants of uncertain or unknown significance (not differentiated in classification)
  - f. Benign / Probably benign
  - g. Other classification
- 8) Regarding the classification used (by the clinician and/or the laboratory you work with) for classifying CNVs in prenatal cases, please check ALL that apply:
  - a. Pathogenic / Probably pathogenic
  - b. Variants of unknown significance
  - c. Susceptibility variants
  - d. Variants of uncertain significance
  - e. Variants of uncertain or unknown significance (not differentiated in classification)
  - f. Benign / Probably benign
  - g. Other classification

## PART 2

The following questions will be about low penetrance CNVs / susceptibility CNVs for neurodevelopmental pathology. Considering 1- strongly disagree, 2- disagree, 3- neither agree nor disagree or have no opinion, 4- agree, 5- strongly agree, please mark the questions below:

1) When a low penetrance variant explains the proband's phenotype, I believe clinicians should offer testing to the parents and all family members who wish to be tested.

1 2 3 4 5

2) The laboratory should report all findings, regardless of their clinical significance, only in postnatal cases.

1 2 3 4 5

3) I consider that parents/probands may have difficulty understanding the information provided in genetic counseling, especially the possible findings of the genetic study.

1 2 3 4 5

4) I consider that parents/probands should have an active role in the decision-making process about the information they want to know.

1 2 3 4 5

5) In our service, all findings, including variants of uncertain significance or low penetrance, are reported only in postnatal cases.

1 2 3 4 5

6) Disclosure incidental findings can lead to parental anxiety.

1 2 3 4 5

7) I believe the clinician should "choose" the findings to disclosure based on what the parents want to know.

1 2 3 4 5

8) The decision on which information to disclose, especially regarding variants of uncertain clinical significance, should be determined by national guidelines and not left to individual laboratories/clinicians.

1 2 3 4 5

9) Parental preferences should determine which results are disclosure, not the opinions of clinicians.

1 2 3 4 5

10) One reason why information about variants of uncertain clinical significance should not be disclosed to parents is that it may result in the termination of healthy pregnancies.

1 2 3 4 5

11) I believe low penetrance CNVs should be investigated in the context of pre-implantation genetic diagnosis when the purpose of the technique is a monogenic disorder.

1 2 3 4 5

12) The laboratory should disclose results of uncertain clinical significance (low penetrance) only in postnatal cases.

1 2 3 4 5

13) In our service, only findings that explain the fetal phenotype are disclosure.

1 2 3 4 5

14) In my opinion, variants of uncertain clinical significance/low penetrance should be reported.

1 2 3 4 5

15) When a low penetrance variant explains the proband's phenotype, clinicians should offer invasive prenatal diagnosis in future pregnancies.

1 2 3 4 5

16) The laboratory should disclose only variants that provide a clinical explanation for the found fetal anomaly.

1 2 3 4 5

17) One reason why variants of uncertain clinical significance should be disclosed is that it gives parents the option of pregnancy termination.

1 2 3 4 5

18) National guidelines for variants of uncertain clinical significance may not be applicable to individual cases and each case should be discussed/thought separately.

1 2 3 4 5

19) I consider that parents/probands may have difficulties understanding the information provided in genetic counseling.

1 2 3 4 5

20) In my service, variants of uncertain clinical significance/low penetrance are disclosure.

1 2 3 4 5

21) I believe the clinician receiving the report should decide what information to give to parents/probands.

1 2 3 4 5

22) Embryos carrying low penetrance CNVs should be "excluded".

1 2 3 4 5

23) In my service, when a low penetrance variant explains the proband's phenotype, clinicians offer testing to parents but not to other family members.

1 2 3 4 5

24) In my service, when a low penetrance variant explains the proband's phenotype, clinicians offer pre-implantation genetic diagnosis.

1 2 3 4 5

25) Whether to disclosure variants of unknown/uncertain clinical significance to parents should be discussed in a national panel of experts.

1 2 3 4 5

26) In our service, all findings, including variants of uncertain significance or low penetrance, are disclosure regardless of the context.

1 2 3 4 5

27) In my service, when a low penetrance variant explains the proband's phenotype, clinicians offer invasive prenatal diagnosis in future pregnancies.

1 2 3 4 5

28) The laboratory should disclose all findings, regardless of their clinical significance, even in prenatal cases.

1 2 3 4 5

29) The laboratory should not disclose results of clinically uncertain significance (low penetrance), even in prenatal cases.

1 2 3 4 5

30) In my service, when a low penetrance variant explains the proband's phenotype, clinicians offer testing to parents and all family members who wish to be tested.

1 2 3 4 5

31) When a low penetrance variant explains the proband's phenotype, clinicians should not offer pre-implantation genetic diagnosis.

1 2 3 4 5

32) When a low penetrance variant explains the proband's phenotype, clinicians should offer testing to parents but not to other family members.

1 2 3 4 5

(Some questions adapted from the questionnaire in the article Shkedi-Rafid, S., 2016)
